# Supplementary material
Source: Springer Nature journal article supplement (https://www.springermedizin.de/resource/supplementary/12883_2013_787_MOESM6_ESM.pdf/9456268)

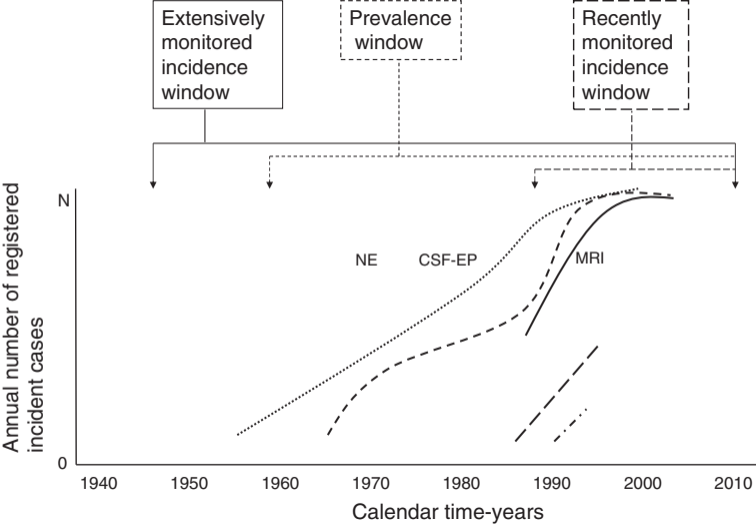

Supplement: MOESM6 [file 9456268]
